# Supplementary material for: Anti-ESBL derivatives of marine endophytic Streptomyces xiamenensis GRG 5 (KY457709) against ESBL producing bacteria
Source: Royal Society of Chemistry journal article supplement (doi:10.1039/d2nj00988a), 2022-01-01
Supplement: d2nj00988a1.pdf [file d2nj00988a1.pdf]

1 **Supporting information**

2 **Anti-ESBL derivatives of marine endophytic *Streptomyces xiamenensis***

3 **GRG 5 (KY457709) against ESBLs producing bacteria**

4  
5 Govindan Rajivgandhi<sup>a,b</sup>, Govindan Ramachandran<sup>b</sup>, Ramachandran Vijayan<sup>b,c</sup>, Franck  
6 Quero<sup>d</sup>, Muthuchamy Maruthupandy<sup>e</sup>, Naiyf S. Alharbi<sup>f</sup>, Shine Kadaikunnan<sup>f</sup>, Manoharan  
7 Natesan<sup>b\*</sup>, Wen-Jun Li<sup>b,f\*</sup>.

8  
9 <sup>a</sup>Department of Marine Science, Bharathidasan University, Tiruchirappalli- 620024, Tamil  
10 Nadu, India.

11 <sup>b</sup>State Key Laboratory of Biocontrol, Guangdong Provincial Key Laboratory of Plant  
12 Resources and Southern Marine Science and Engineering Guangdong Laboratory (Zhuhai),  
13 School of Life Sciences, Sun Yat-Sen University, Guangzhou-510275, PR China.

14 <sup>c</sup>School of Life Sciences, Jawaharlal Nehru University, New Delhi 67, India

15 <sup>d</sup>Laboratorio de Nanocelulosa y Biomateriales, Departamento de Ingeniería Química,  
16 Biotecnología y Materiales, Facultad de Ciencias Físicas y Matemáticas, Universidad  
17 de Chile, Avenida Beauchef 851, Santiago, Chile.

18 <sup>e</sup>Lab of Toxicology, Department of Health Sciences, The Graduate School of Dong-A  
19 University, 37, Nakdong-Dearo 550 Beon-Gil, Saha-Gu Busan, 49315, South Korea.

20 <sup>f</sup>Department of Botany and Microbiology, College of Science, King Saud University,  
21 Riyadh 11451, Saudi Arabia.

22 <sup>g</sup>State Key Laboratory of Desert and Oasis Ecology, Xinjiang Institute of Ecology and  
23 Geography, Chinese Academy of Sciences, Urumqi 830011, PR China.

24  
25 \*Email: [biomano21@yahoo.com](mailto:biomano21@yahoo.com); [liwenjun3@mail.sysu.edu.cn](mailto:liwenjun3@mail.sysu.edu.cn).

26 **Supplementary Figures (SF)**

27 SF. 1. Confirmation of ESBL production in *P.aeruginosa* (a, c) and *K. pneumoniae* (b, d)  
28 using third generation chapalosporin antibiotics.

29 SF. 2. Phylogenetic confirmation of endophytic actinomycetes *Streptomyces xiamenensis*  
30 GRG 5 (KY457709) using MEGA 7.0.

31 SF. 3. UV-spectroscopy analysis of partially purified TLC extract of *Streptomyces*  
32 *xiamenensis* GRG 5 (KY457709).

33 SF. 4. Analytical HPLC of partially purified crude TLC extract of *Streptomyces*  
34 *xiamenensis* GRG 5 (KY457709).

35 SF. 5. Anti-bacterial validation of HPLC all the fractions against both the uropathogens  
36 of *P. aeruginosa* (a) and *K. pneumoniae* (b).

37 SF. 6. Possible compounds of mass chromatogram present in the HPLC fractions 3 of  
38 *Streptomyces xiamenensis* GRG 5 (KY457709) by GCMS.

39 SF. 7. Preparative HPLC analysis of active compound 1 from active HPLC fraction 3.

40 SF. 8. FT-IR spectrum of purified compound 1 of *Streptomyces xiamenensis* GRG 5  
41 (KY457709).

42 SF. 9. LC-MS spectrum of purified compound 1 of *Streptomyces xiamenensis* GRG 5  
43 (KY457709).

44 SF. 10 (a). <sup>1</sup>H NMR (a), <sup>13</sup>C NMR (b) analysis of purified compound 1 from active  
45 HPLC fraction 3 of *Streptomyces xiamenensis* GRG 5 (KY457709) and HMBC and  
46 HMQC analysis of purified compound 1 from active HPLC fraction 3 of *Streptomyces*  
47 *xiamenensis* GRG 5 (KY457709). The chemicals groups interaction was available in  
48 insert file (c).

49

50

51

52

53

54

55

56

57

58

59

60

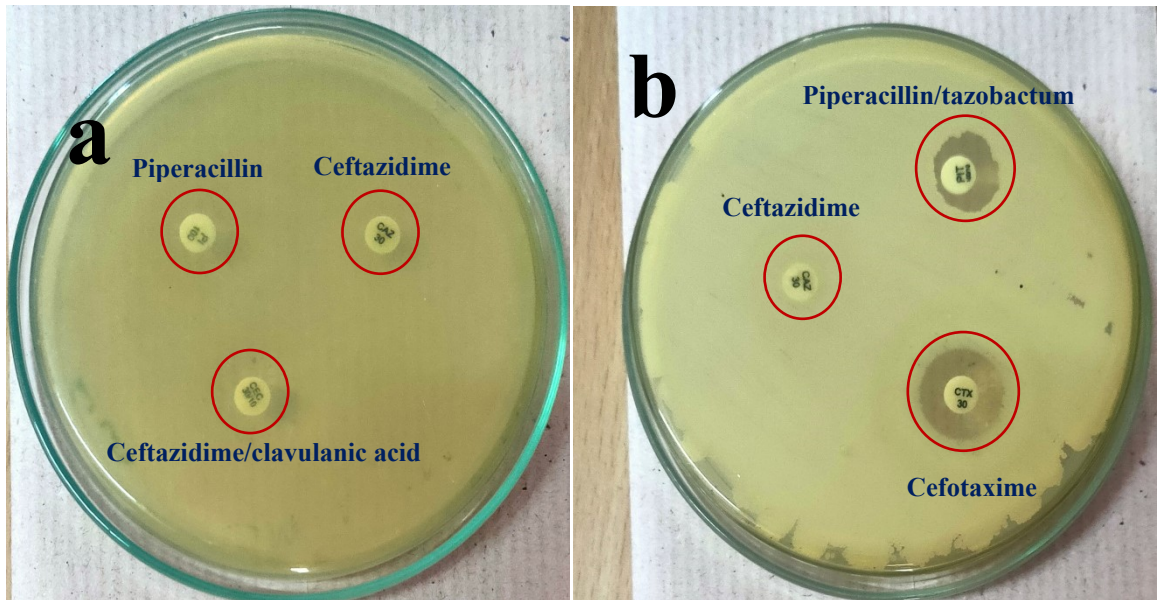

61

62

63

64

65

66

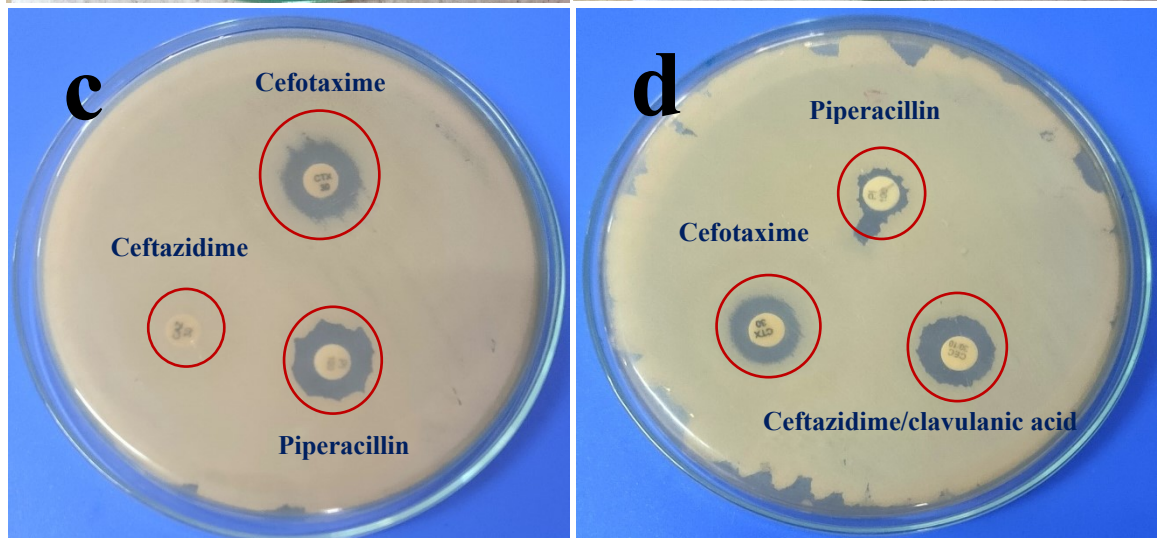

67 SF.

68 1.

69

70

71

72

73

74

75

76

77

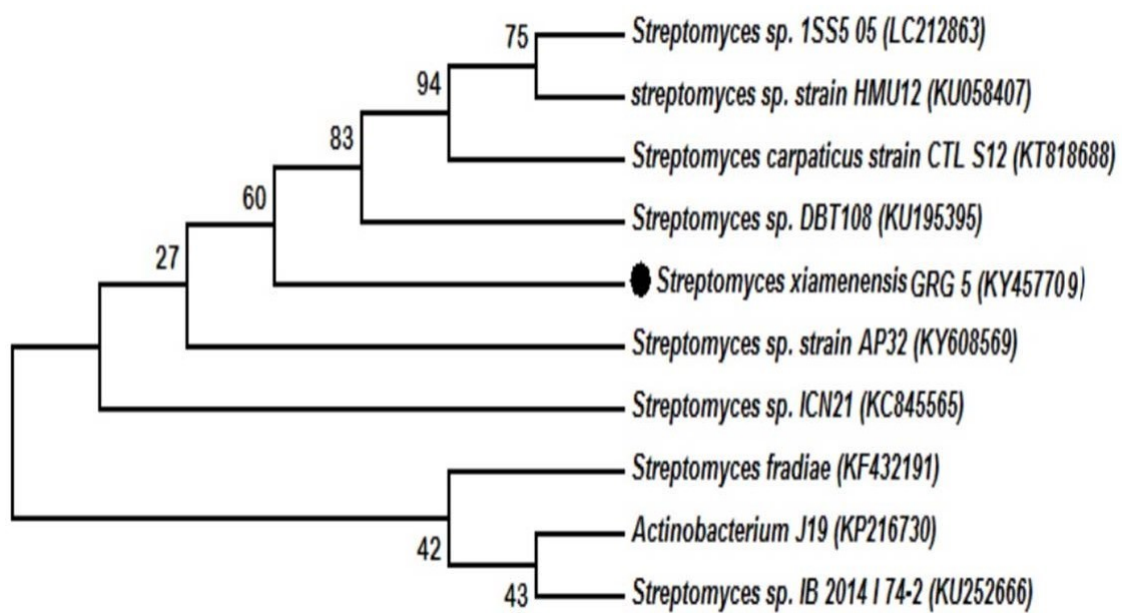

78

79

80

81

82

83

84

85

86

87

88 **SF. 2.**

89

90

91  
92  
93  
94  
95  
96  
97  
98  
99  
100  
101  
102  
103  
104  
105  
106  
107  
108  
109  
110  
111  
112  
113  
114  
115  
116  
117  
118  
119

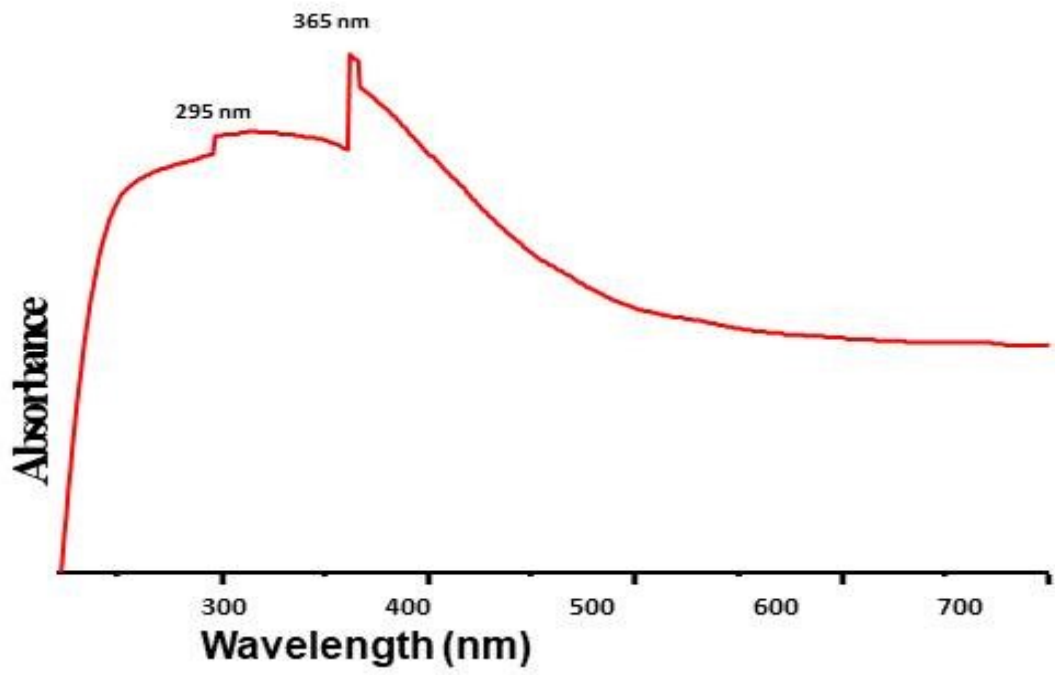

120 SF. 3.

121

122

123

124

125

126

127

128

129

130

131

132

133

134

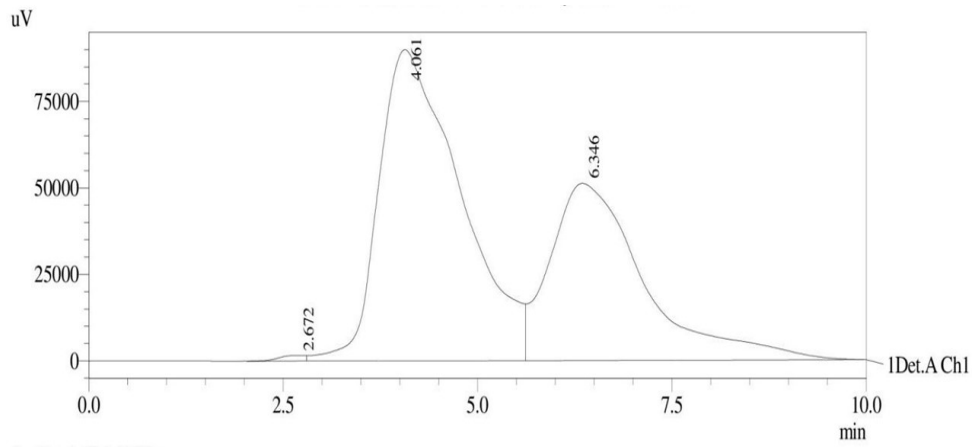

1 Det.A Ch1 / 254nm

PeakTable

Detector A Ch1 254nm

| Peak# | Ret. Time | Area     | Height | Area %  | Height % |
|-------|-----------|----------|--------|---------|----------|
| 1     | 2.672     | 38526    | 1646   | 0.353   | 1.153    |
| 2     | 4.061     | 6567750  | 89960  | 60.143  | 62.995   |
| 3     | 6.346     | 4313954  | 51199  | 39.504  | 35.852   |
| Total |           | 10920230 | 142805 | 100.000 | 100.000  |

135

136

137 SF. 4.

138

139

140  
141  
142  
143  
144  
145  
146  
147  
148  
149  
150  
151  
152  
153  
154

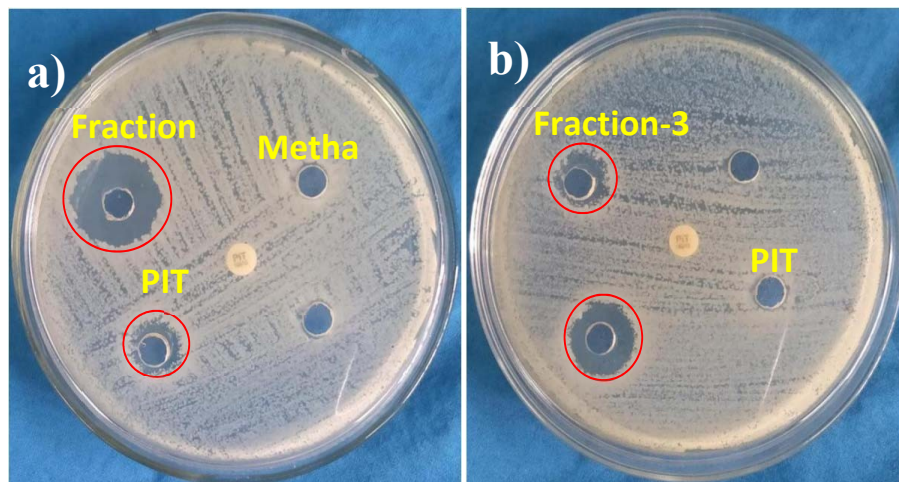

155  
156  
157 **SF. 5.**  
158  
159  
160  
161

162  
163  
164  
165  
166  
167  
168  
169  
170  
171  
172  
173  
174  
175  
176  
177  
178  
179  
180  
181  
182  
183  
184  
185  
186  
187  
188  
189  
190  
191

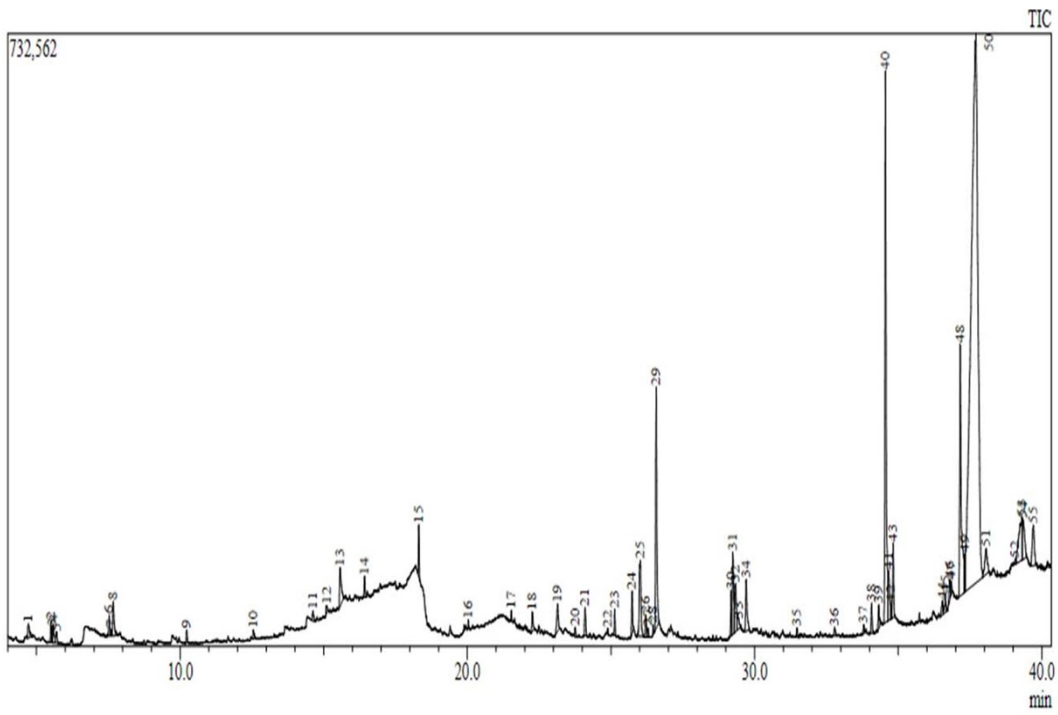

**SF. 6.**



192  
 193  
 194  
 195  
 196  
 197  
 198  
 199  
 200  
 201  
 202  
 203  
 204  
 205  
 206  
 207  
 208  
 209  
 210  
 211  
 212  
 213  
 214  
 215  
 216  
 217  
 218  
 219  
 220  
 221

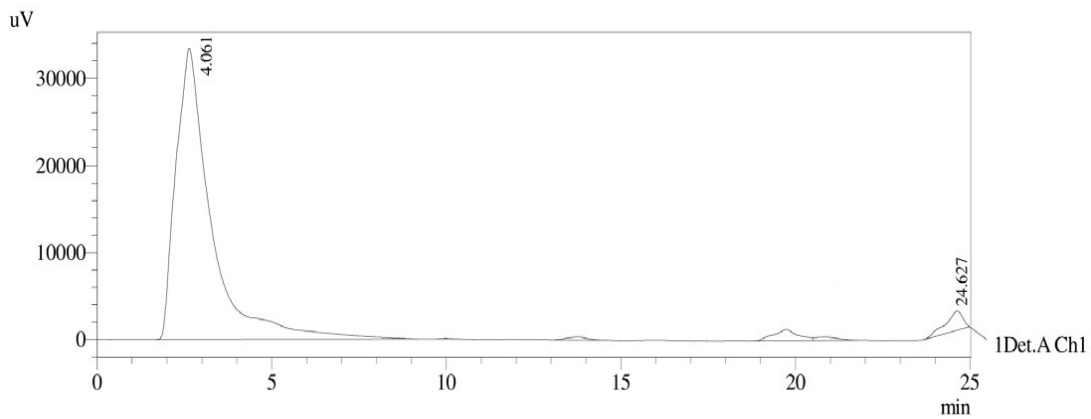

1 Det.A Ch1 / 254nm

PeakTable

Detector A Ch1 254nm

| Peak# | Ret. Time | Area    | Height | Area % | Height % |
|-------|-----------|---------|--------|--------|----------|
| 1     | 4.061     | 6567750 | 89960  | 60.143 | 62.995   |
| Total | 4.061     | 6567750 | 89960  | 60.143 | 62.995   |

**SF. 7.**

222  
223  
224  
225  
226  
227  
228  
229  
230  
231  
232  
233  
234  
235  
236

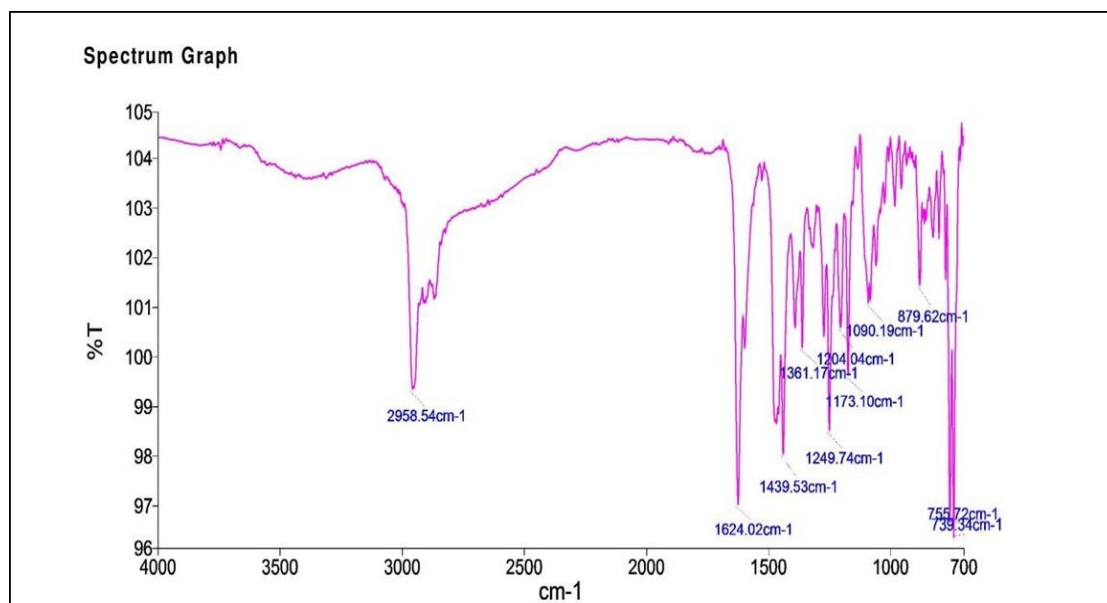

237  
238  
239 SF. 8.  
240  
241  
242

243  
244  
245  
246  
247  
248  
249  
250  
251  
252  
253  
254  
255  
256

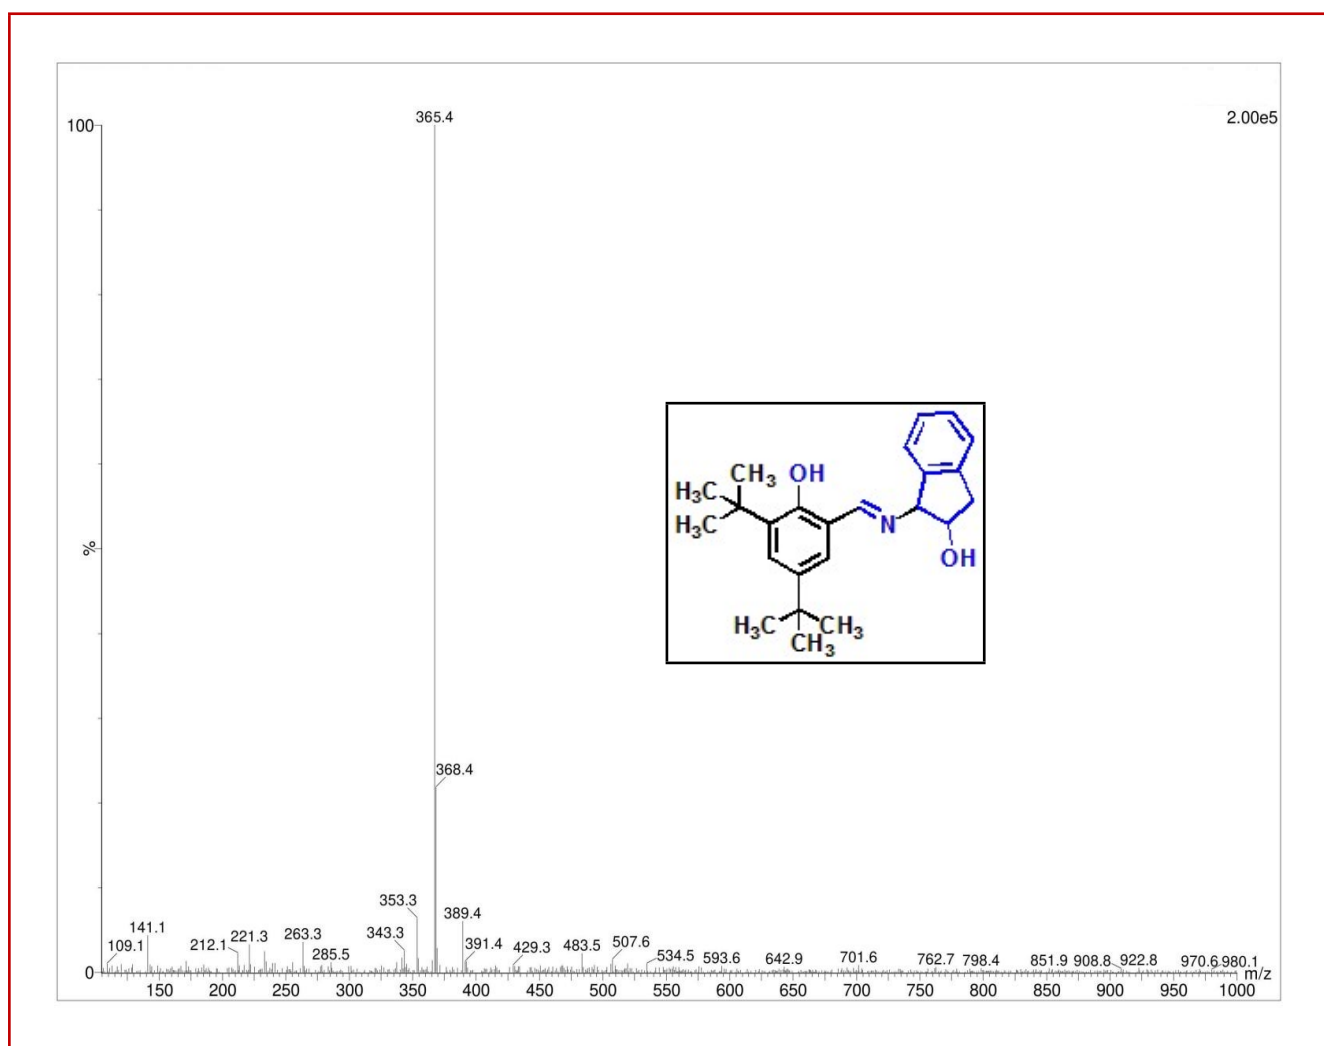

257

258 **SF. 9.**

259

260

261

262

263

264

265

266

267

268

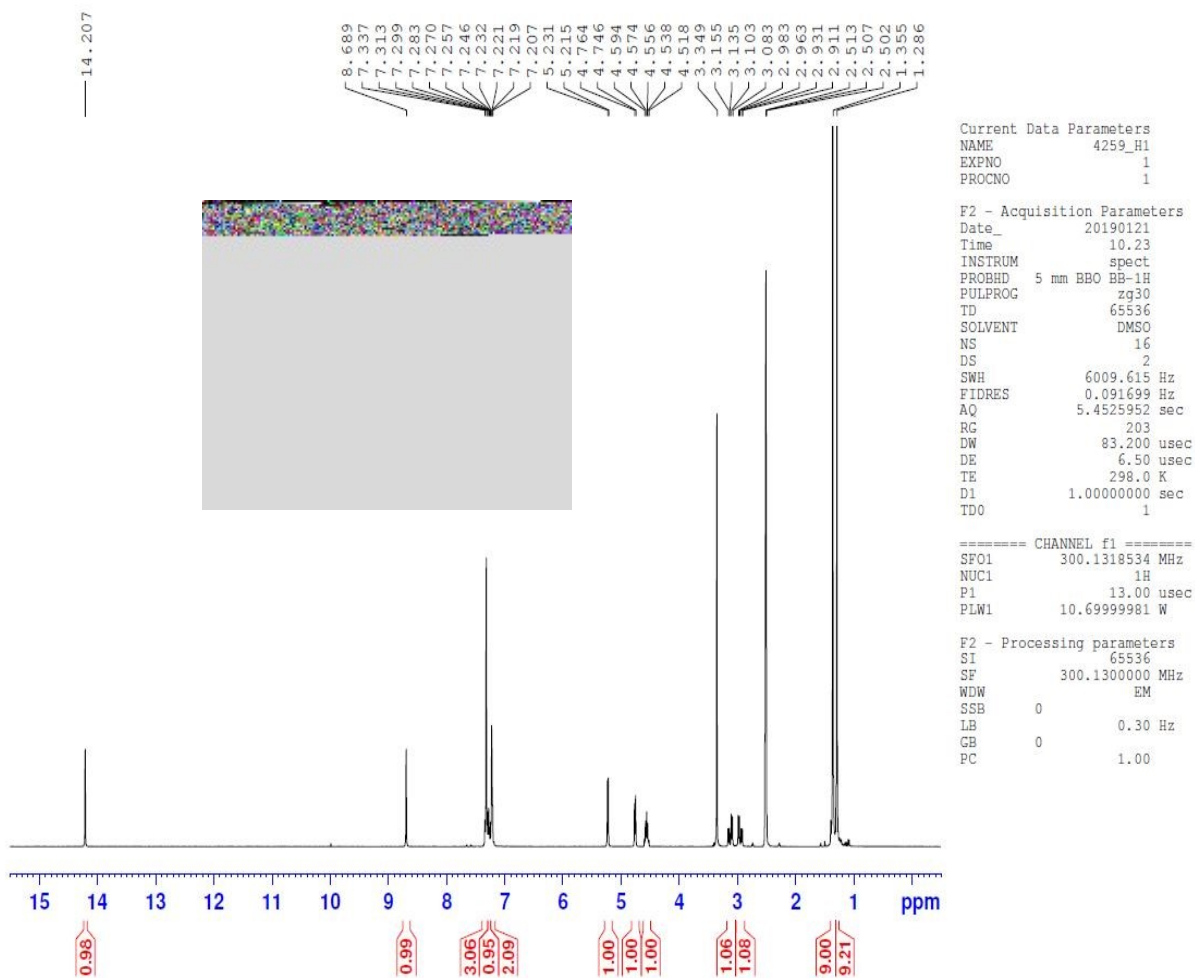

269

270 **SF. 10a**

271

272

273

274

275

276

277

278

279

280

281

282

283

284

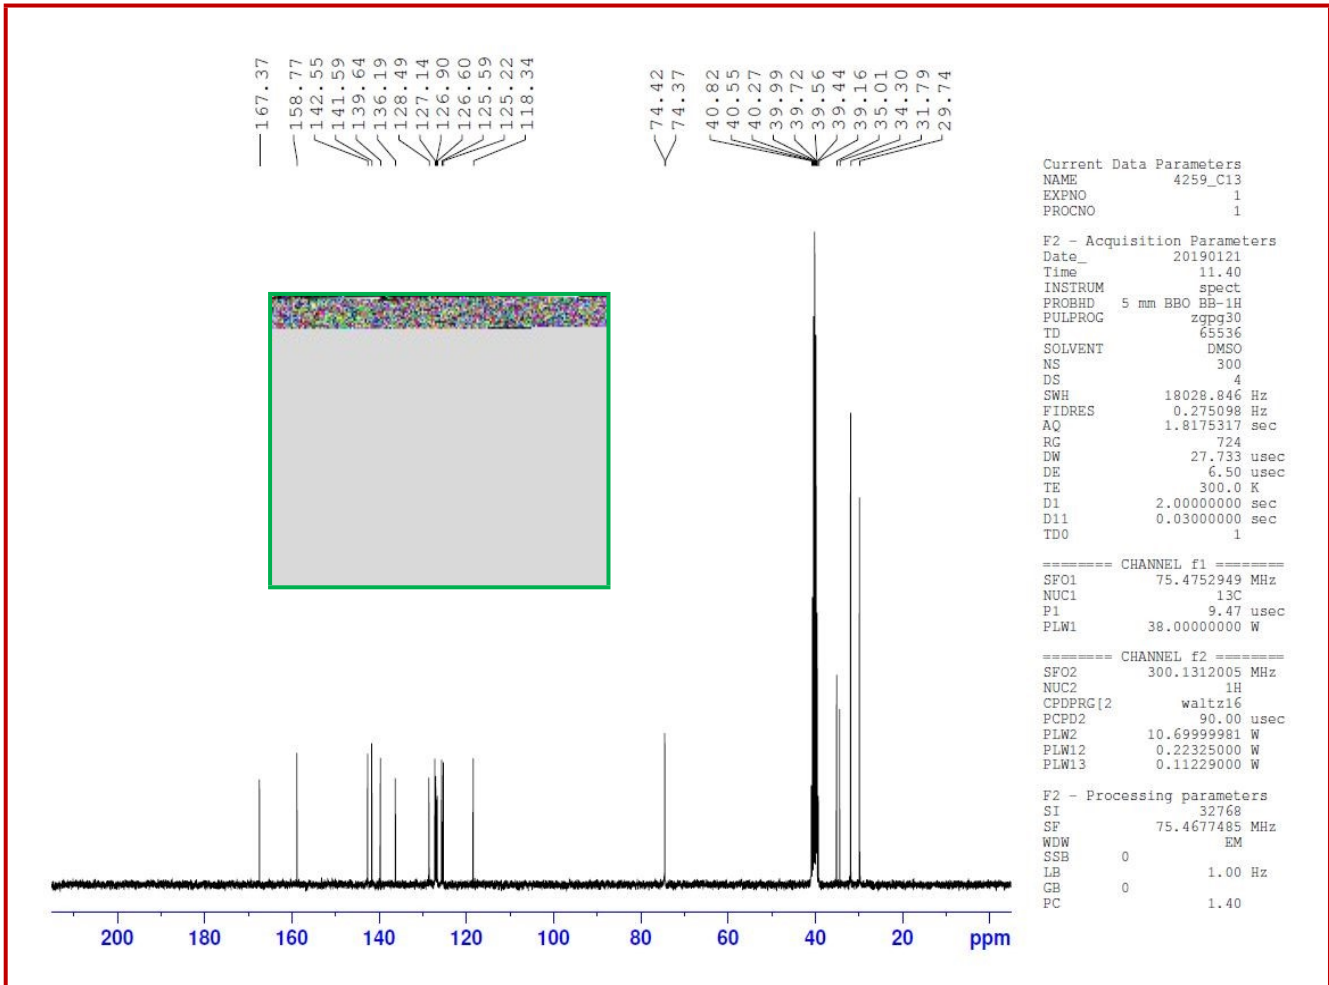

285

286 **SF. 10b.**

287

288

289

290

291

292

293

**a**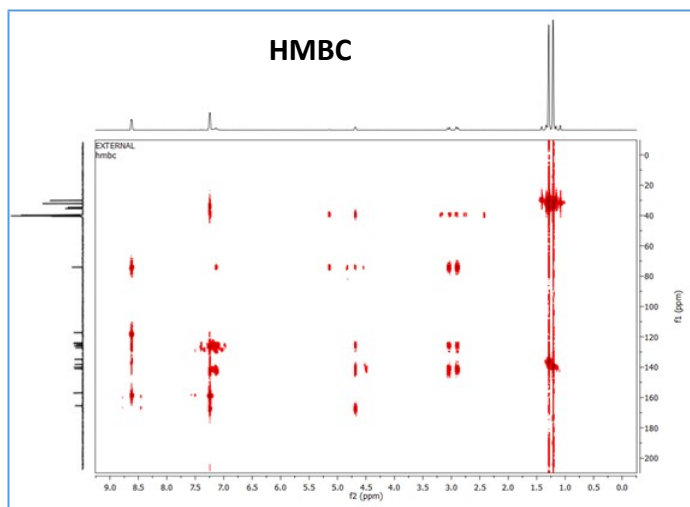**b**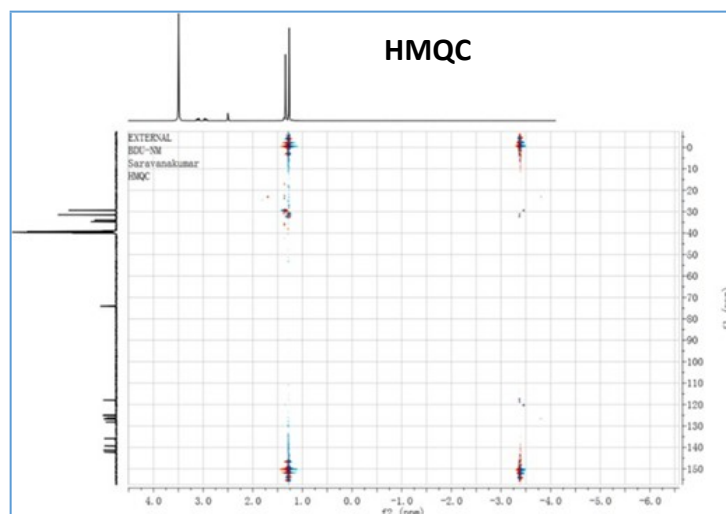**c**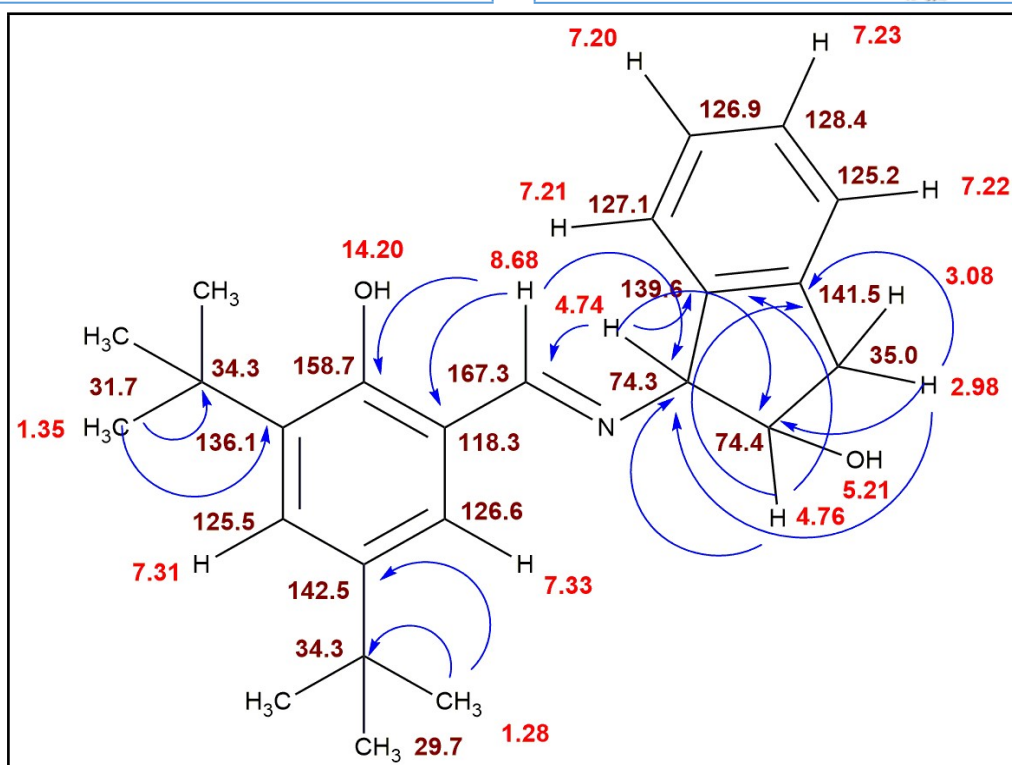

295

296

297

298

299

300

301

302

303

304

305

306

307

308

309 **SF. 10c.**

310
